# Supplementary material for: Overcoming challenges in the synthesis of a lignin-carbohydrate complex (LCC) model: Mitsunobu versus Appel product
Source: Springer Nature journal article supplement (doi:10.1007/s10570-023-05046-6), 2023-01-12
Supplement: MOESM1 [file 23918076]

## Supplementary Information (SI)

### Overcoming challenges in the synthesis of a lignin-carbohydrate complex (LCC) model – Mitsunobu versus Appel product

*Thomas Elschner\*, Erica Brendler, Steffen Fischer*

Figure S1:

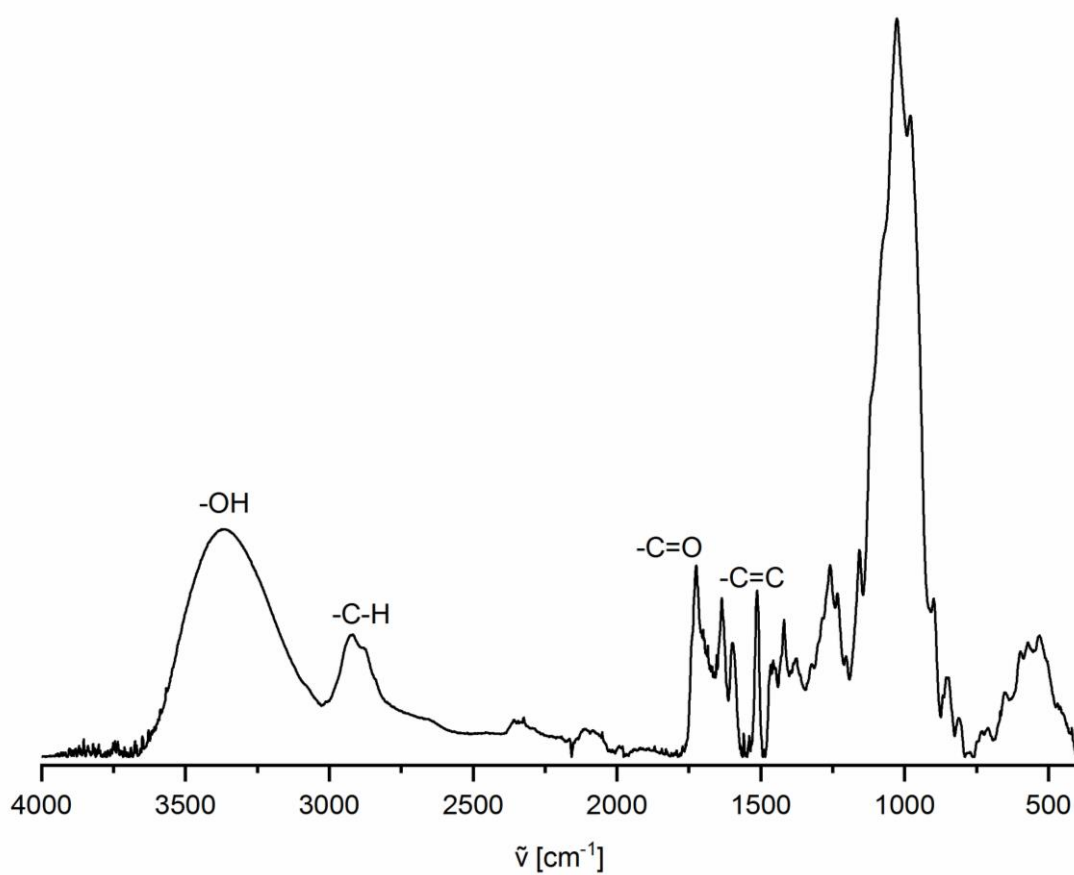

FTIR spectrum of arabinoxylan ferulate **3a**.

Figure S2:

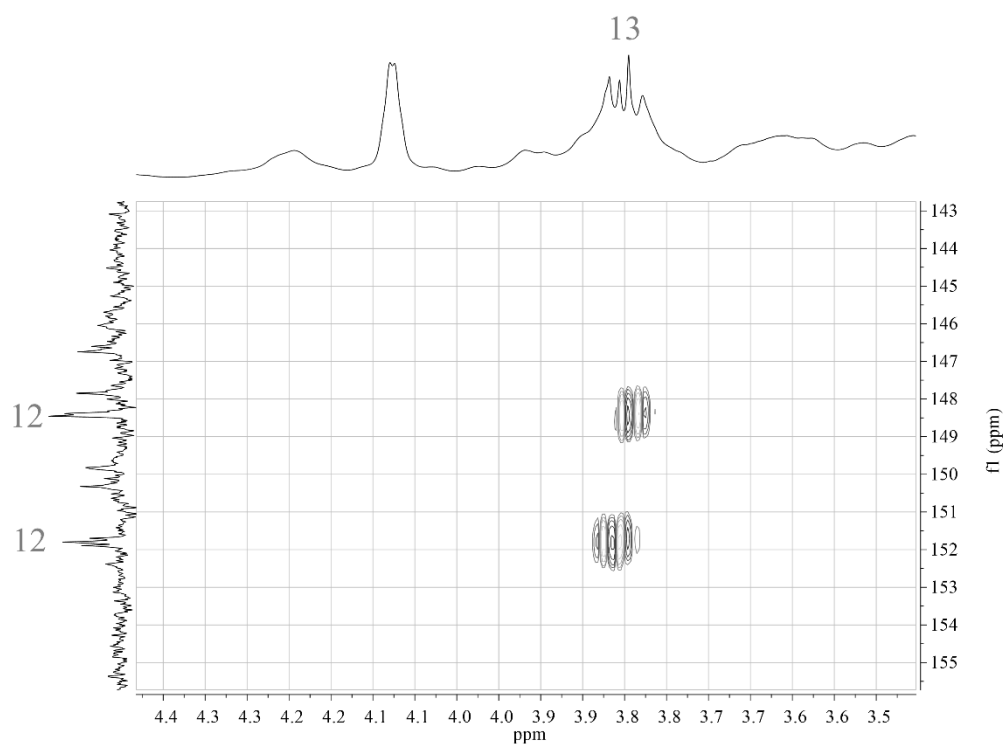

Section 1 of HMBC NMR spectrum of arabinoxylan ferulate **3a** recorded in DMSO-d<sub>6</sub>.

Figure S3:

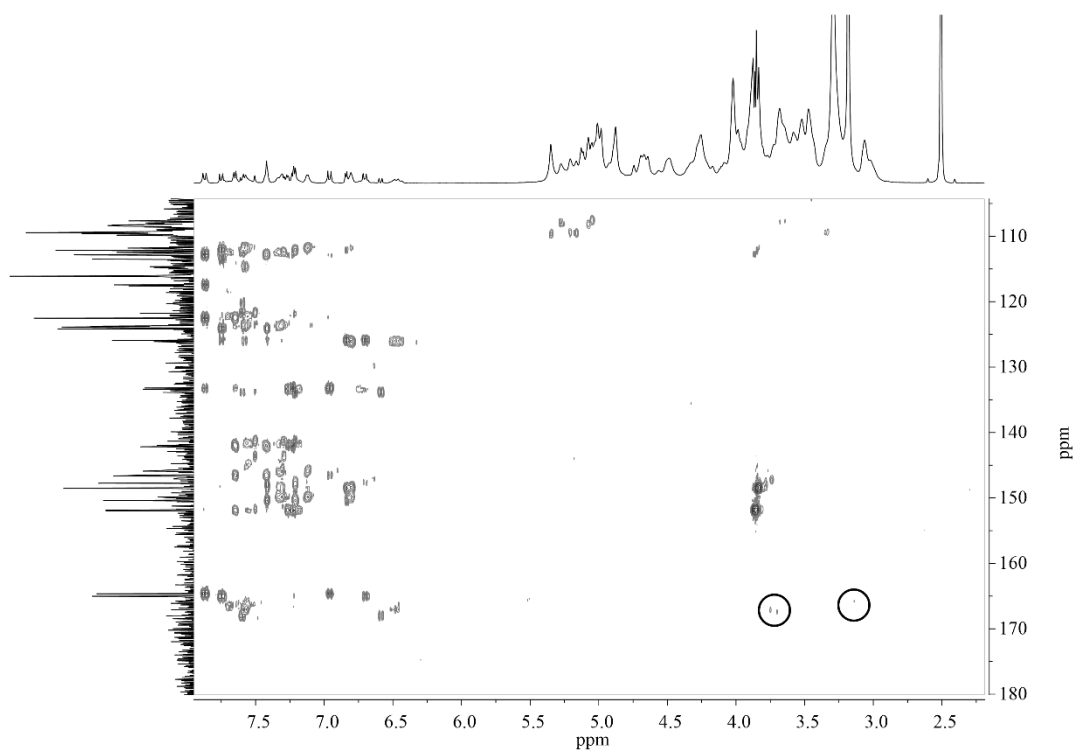

Section 2 of HMBC NMR spectrum of arabinoxylan ferulate **3a** recorded in DMSO-d<sub>6</sub>.

Figure S4:

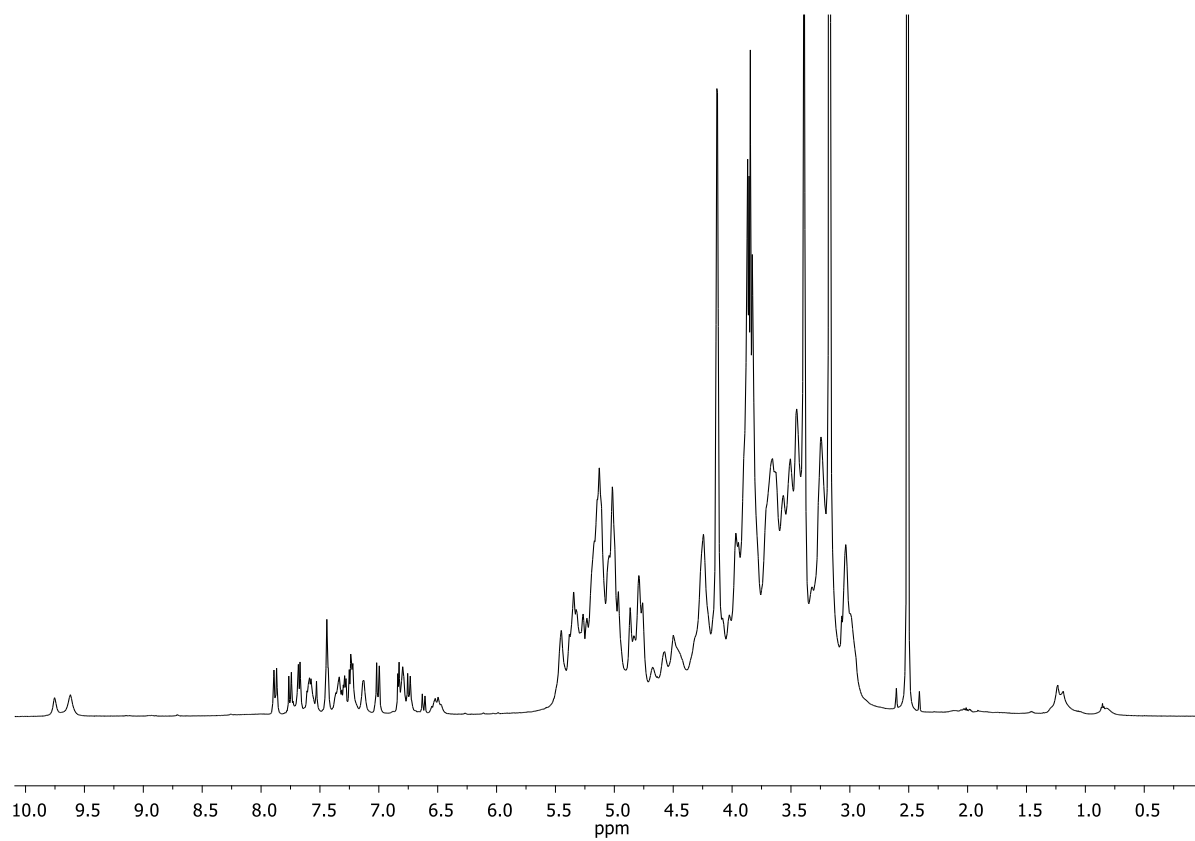

<sup>1</sup>H NMR spectrum of arabinoxylan ferulate **3a** recorded in DMSO-d<sub>6</sub>.

Figure S5:

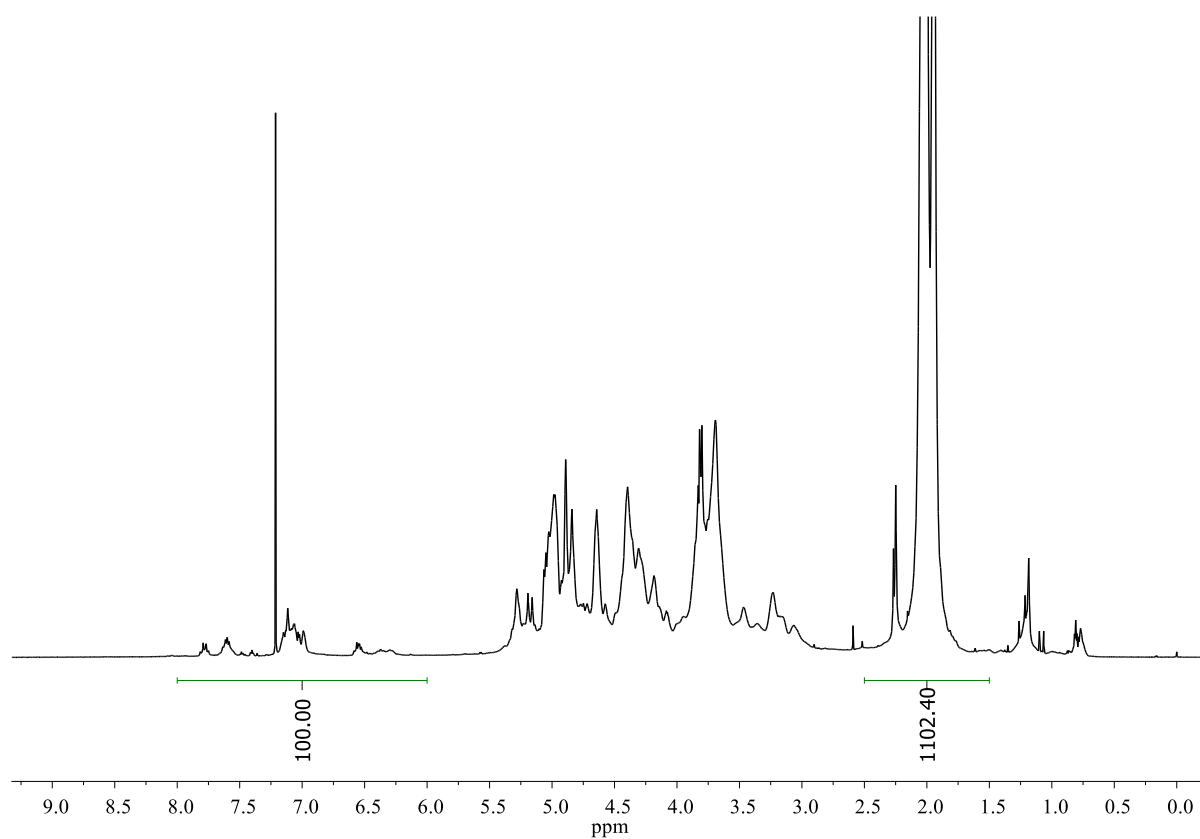

$^1\text{H}$  NMR spectrum of peracetylated arabinoxylan ferulate **3a** recorded in  $\text{CDCl}_3$ .

Scheme S1:

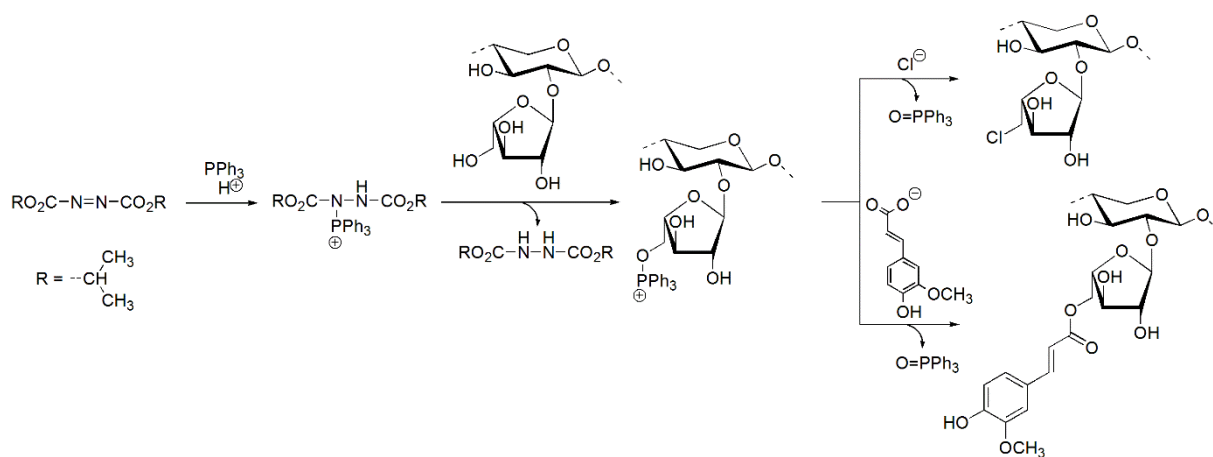

Reaction mechanism describing the formation of Mitsunobu and Appel product.
